# Supplementary material
Source: PubMed Central journal article supplement (PMC6669122)
Supplement: NIHMS1009884-supplement-Supplemental_material.pdf [file NIHMS1009884-supplement-Supplemental_material.pdf]

## SUPPLEMENTARY MATERIALS

Baum A, Gomez S, Lightwood J, Bruzelius E, Glantz S, Basu S. Estimating the Long-run Relationship between State Cigarette Taxes and County Life Expectancy. *Tobacco Control*.

### Supplementary Text

- Methods

### Supplementary Tables and Figures

- Table S1. Co-Integration Tests
- Table S2. Formulating the Error-Correction-Model in Logs
- Table S3. Association of Cigarette Tax and County-level Life Expectancy by Income Quintile
- Table S4. Association of Cigarette Tax and County-level Life Expectancy across Rural vs. Urban Counties
- Table S5. Association of Cigarette Tax and Smoking Prevalence
- Table S6. Association of Cigarette Tax and County-level Smoking Prevalence (%) by Income Quintile
- Table S7. Association of Cigarette Tax and Smoking prevalence (%) by urban/rural status
- Table S8. Null Hypothesis Rejections for Mortality Rate Changes By Cause Of Death
- Table S9. Sensitivity Analysis: Association of Cigarette Tax and County-level Life Expectancy (in years) using Lag Orders of 1 – 5 years
- Table 10. Dynamic instrumental variables panel model (Blundell and Bond, 1998)
- Table S11. Correlation of residuals and time-varying covariates

- Table S12. Sensitivity Analysis: Association of Cigarette Tax and County-level Life Expectancy after Removing States where Local Cigarette Taxes are in Effect
- Table S13. Sensitivity Analysis: Legal Restrictions on Smoking
- Table S14. Assessing Plausibility of a Causal Interpretation for the Observed Long-run Association of Cigarette Tax and County-level Life Expectancy
- Figure S1. Geographic variation in state cigarette taxes rate level and year-to-year changes
- Figure S2. National trends in life expectancy and cigarette tax rates
- Figure S3. Residuals from a regression of life expectancy on cigarette taxes
- Figure S4. Residuals from the log error-correction model
- Figure S5. Long-run Association of Cigarette Tax and Mortality Rates by Cause of Death
- Figure S6. Sensitivity analysis: main error-correction-model with annual state smoking-related policies included as time-varying covariates

## SUPPLEMENTARY TEXT

### Methods

#### *Main Specification*

Our main specification was a multilevel dynamic panel regression model with fixed effects for county (Stata command "xtpmg, dfe"(28-30)):

(1)

$$y_{i,t} = \sum_{k=1}^3 \alpha_k y_{i,t-k} + \beta Tax_{s,t-1} + \delta X_{i,t-1} + \mu_i + \varepsilon_{it}$$

Where  $y_{it}$  is estimated life expectancy at birth of county  $i$  within state  $s$  during year  $t$ ,  $Tax_{st}$  is the cigarette tax rate in 2016 dollars of state  $s$  in year  $t$ , and  $X_{i,t}$  is a vector of time-varying county-year covariates on population demographics, educational attainment, and income as specified in the main text. We clustered standard errors at the state-level using the non-parametric, cluster-robust “sandwich” estimator (Stata option “vce(cluster)”) to account for serial correlation in life expectancy over time within counties, intra-cluster correlation in life expectancy across counties within states, and loss of degrees-of-freedom from imputation of covariates(34).

In additional analyses, we replaced  $y_{i,t}$  in Equation 1 with county annual smoking prevalence, to assess whether the observed association between cigarette taxes and life expectancy was plausibly related to changes in smoking prevalence.

#### *Derivation of error correction model through decomposition of Equation 1*

Equation 1, which describes an autoregressive distributive lag model(29), can be rewritten as an error correction model (as in reference 29) that separates the short-term and long-term dynamics of changes in tax rates and life expectancy. All coefficients (e.g. cointegrating coefficients, error

correction terms, and first differences of time-varying covariates) reported in the manuscript, tables, and figures correspond to the following error correction model:

(2)

$$\Delta y_{i,s,t} = \phi_{i,s}(y_{i,t-1} - \theta'_{i,s} X_{i,s,t}) + \sum_{j=1}^{p-1} \alpha^*_{ij} \Delta y_{i,t-j} + \sum_{j=1}^{q-1} \beta_{ij} \Delta Tax_{s,t-j} + \sum_{j=1}^{q-1} \delta^{*'}_{ij} \Delta X_{i,t-j} + \mu_i + \varepsilon_{it}$$

where:

(3)

$$\phi_{is} = - \left( 1 - \sum_{j=1}^p \alpha_{isj} \right), \theta_i = \frac{\sum_{j=1}^p \delta_{isj} + \sum_{j=1}^{q-1} \beta_{ij}}{1 - \sum_k \alpha_{isk}}, \alpha^*_{isj} = - \sum_{m=j+1}^p \alpha_{ism}$$

(4)

$$for\ j = 1, 2, \dots, p-1$$

and

(5)

$$\delta^*_{i,s,j} = - \sum_{m=j+1}^p \delta_{i,s,m} \quad for\ j = 1, 2, \dots, p-1$$

We chose a reduced-form error-correction specification (all explanatory variables are lagged) that estimates the net association of cigarette taxes and life-expectancy after accounting for the effect of contemporaneous structural relationships(31-33). We selected the optimal lag order for life expectancy based on the mean of the distribution of optimal lags for each county (Stata command “ardl, aic”).

After rewriting the model, of particular interest is  $\phi_{is}$ , the error-correction speed. If  $\phi_{is} = 0$ , then there is no long-term relationship between the state level taxes and life expectancy. Furthermore, as shown in Equation (2), the expected sign of the error term is negative, since  $\sum_{j=1}^p \alpha_{isj} < 1$ . Finally,  $\theta'_{is}$  is the vector of long-run relationships between the independent variables and life expectancy. We used the fixed effect version of this model, in which the slope coefficients are assumed to be the same for all counties/states, while the intercepts are allowed to differ. This version of the model also assumes that the speed of adjustment coefficient and the short-run coefficients to be equal among units of observation. Blackbourne and Frank (29) and Baltagi, Griffin, and Xiong (30) show that there is risk of bias from the endogeneity between the error term and the lagged dependent variable. We ran Hausman tests between the fixed effects model and the mean group estimator, which allows all the parameters to vary among units (states/counties), and showed that the simultaneous equation bias is minimal, which justifies our use of the fixed effects model in contrast with the mean group (MG) and pooled mean group (PMG) that are also proposed by Blackbourne and Frank (29).

### ***Testing of Model Assumptions***

Further testing and sensitivity analyses were performed to avoid spurious associations between life expectancy (or, in mediator analysis, smoking prevalence) and cigarette taxes, given they are non-stationary variables(13, 14). We confirmed there is a cointegrating relationship that ties the stochastic trends of life expectancy (or smoking prevalence) and cigarette taxes together – such that they cannot wander away from each other for an extended period of time – using a Johansen co-integration test of whether there is a linear combination of life expectancy (or smoking prevalence) and cigarette taxes that is stationary. The Johansen procedure uses a likelihood-based approach to determine the maximum possible number of cointegrating relationships in the data. (Stata command “vecrank”(35, 40)). The panel co-integration test developed by

Westerlund(36, 41), which tests whether there is a statistically significant adjustment from disequilibrium back to the hypothesized long-run equilibrium, was used to check the results. We additionally checked whether the model's residuals were normal and stationary, to ensure assumptions for a cointegrating regression model coefficient interpretation were fulfilled.

### ***Secondary Analyses***

In additional analyses, we replaced the dependent variable (life expectancy) with county annual smoking prevalence, to assess whether the observed association between cigarette taxes and life expectancy was plausibly related to changes in smoking prevalence. To further assess the plausibility that the associations we observed reflected causal relationships, we examined the relationship between smoking prevalence and life expectancy and between cigarette taxes and county mortality rates by cause of death.

### ***Sensitivity Analyses***

We first examined whether the selection of lag order qualitatively influenced our results. Second, we fit a generalized method of moments dynamic panel estimator developed by Blundell and Bond(37), which relaxes the assumption of strongly exogenous covariates and was designed for small-T, large-N datasets. Third, we restricted analysis to the 43 out of 51 (counting the District of Columbia) states where there is no local government taxation of tobacco(38). Fourth, we included state-year workplace, bar and restaurant smoking restrictions from The National Adult Tobacco Survey(39) as time-varying covariates in the main analysis. Fifth, we repeated the analysis using annual life expectancy estimates for the 100 most populated U.S. community zones derived from official death records. Sixth, we conducted a falsification test of the association between future, not-yet-announced cigarette taxes (5 years in the future) and current life expectancy and current smoking prevalence.

## Supplementary Tables and Figures

**Table S1.** Co-integration Tests

**Panel A.** Unit root tests to ensure aggregate variables are stationary at the same level (stata command “dfuller”)

| <i>Levels</i>      | <u>Overall</u><br><i>Evaluate average<br/>across all counties</i><br><b>P-Value</b> | <u>By County</u><br><i>Evaluate each<br/>county separately</i><br><b>% of P-Values &lt; 0.05</b> |
|--------------------|-------------------------------------------------------------------------------------|--------------------------------------------------------------------------------------------------|
| Life Expectancy    | 0.833                                                                               | 0% (mean 0.629)                                                                                  |
| Smoking Prevalence | 0.967                                                                               | 0% (mean 0.999)                                                                                  |
| Cigarette Taxes    | 0.715                                                                               | 3% (mean 0.665)                                                                                  |
| <i>Differences</i> |                                                                                     |                                                                                                  |
| Life Expectancy    | 0.045                                                                               | 97% (mean 0.006)                                                                                 |
| Smoking Prevalence | 0.044                                                                               | 100% (mean 0.044)                                                                                |
| Cigarette Taxes    | 0.004                                                                               | 86% (mean 0.017)                                                                                 |

Notes: H0: Series has a unit-root; H1: Series is stationary.

**Panel B.** Determining the number of cointegrating equations between dependent variables and cigarette taxes averaged by year, using the Johansen Test

### *B1. Dependent Variable Averaged by Year*

| <b>Rank</b>               | <b>Trace Statistic</b> | <b>5% critical value</b> | <b>1% critical value</b> |
|---------------------------|------------------------|--------------------------|--------------------------|
| <i>Life Expectancy</i>    |                        |                          |                          |
| Rank = 0                  | 26.06***               | 15.41                    | 20.04                    |
| Rank = 1                  | 0.22                   | 3.76                     | 6.65                     |
| <i>Smoking Prevalence</i> |                        |                          |                          |
| Rank = 0                  | 20.74***               | 15.41                    | 20.04                    |
| Rank = 1                  | 3.49                   | 3.76                     | 6.65                     |

### *B2. Dependent Variable Averaged by State-Year*

|                           | <b>% states with maximum rank = 1 by 5% critical value</b> |
|---------------------------|------------------------------------------------------------|
| <i>Life Expectancy</i>    | 79.59%                                                     |
| <i>Smoking Prevalence</i> | 68.29%                                                     |

*B3. Dependent Variable at County-Year Level*

| <b>Westerlund panel cointegration tests (with leads)</b> |                        |         |         |                           |         |         |
|----------------------------------------------------------|------------------------|---------|---------|---------------------------|---------|---------|
|                                                          | <u>Life Expectancy</u> |         |         | <u>Smoking Prevalence</u> |         |         |
|                                                          | Value                  | Z-Value | P-Value | Value                     | Z-Value | P-Value |
| Pt                                                       | -19.824                | -9.541  | < 0.001 | -15.992                   | 5.789   | < 0.001 |
| Pa                                                       | -9.310                 | -8.171  | < 0.001 | -6.529                    | 3.662   | < 0.001 |

*Notes:* H0:  $\alpha_i = 0$  for all  $i$  (no cointegrating relationship at all); H1:  $\alpha_i < 0$  for all  $i$ , where  $\alpha_i$  is an estimate of the speed of error-correction towards the long run equilibrium. The Pa and Pt test statistics pool information over all the cross-sectional units to test H0:  $\alpha_i = 0$  for all  $i$  vs H1:  $\alpha_i < 0$  for all  $i$ . Rejection of H0 should therefore be taken as evidence of cointegration for the panel as a whole.

**Panel C.** Testing for stationarity of residuals of regression of dependent variables on cigarette tax

| <b>Harris-Tzavalis unit-root test for fixed T panels</b> |                        |         |                           |         |
|----------------------------------------------------------|------------------------|---------|---------------------------|---------|
|                                                          | <u>Life Expectancy</u> |         | <u>Smoking Prevalence</u> |         |
|                                                          | Statistic              | P-Value | Statistic                 | P-Value |
| rho                                                      | 0.791                  | <0.001  | 0.827                     | 0.0289  |

*Notes:* H0: All panels contain unit roots ( $\rho_i = \rho$  for all  $i$ ); H1: Some panels are stationary ( $\rho < 1$ )

**Table S2.** Formulating the Error-correction-model in Logs**Panel A.** Elasticity of Life Expectancy to \$1 Changes in Cigarette Tax

|                                                               | Log Life<br>Expectancy | Log Smoking<br>Prevalence |
|---------------------------------------------------------------|------------------------|---------------------------|
| Log Cigarette Tax (Long Run) (\$/pack)                        | 0.01***<br>(0.00)      | -0.10***<br>(0.01)        |
| Speed of adjustment                                           | -0.08***<br>(0.01)     | -0.16***<br>(0.02)        |
| Lag 1 of Log Life Expectancy (years)                          | -0.16***<br>(0.02)     | 0.03<br>(0.02)            |
| Lag 2 of Log Life Expectancy (years)                          | 0.03***<br>(0.01)      | 0.13***<br>(0.02)         |
| Lag 3 of Log Life Expectancy (years)                          | -0.01<br>(0.01)        | 0.08***<br>(0.02)         |
| $\Delta$ Log Cigarette tax <sub>t</sub> (Short run) (\$/pack) | -0.00<br>(0.00)        | 0.01***<br>(0.00)         |
| Share female (%)                                              | 0.01<br>(0.01)         | 0.06<br>(0.09)            |
| Share under 18 (%)                                            | 0.00<br>(0.00)         | -0.14**<br>(0.06)         |
| Share over 65 (%)                                             | 0.00*<br>(0.00)        | -0.11**<br>(0.04)         |
| Share black (%)                                               | -0.03***<br>(0.01)     | 0.22**<br>(0.11)          |
| Share Hispanic (%)                                            | -0.00***<br>(0.00)     | -0.51<br>(0.47)           |
| Share completing high school (%)                              | 0.01**<br>(0.00)       | 2.62**<br>(1.17)          |
| Income per capita (\$)                                        | 0.00***<br>(0.00)      | 0.00<br>(0.00)            |
| Constant                                                      | 0.34***<br>(0.04)      | 0.49***<br>(0.06)         |

Cluster-robust standard errors in parentheses

\*\*\* p&lt;0.01, \*\* p&lt;0.05, \* p&lt;0.1

*Notes:* Changes in the natural log of life expectancy (and smoking prevalence) from the main regression analysis with adjustment for the natural log of state-year cigarette taxes, county-year income per capita, share female, share Black, share over 65, share under 18, and share with high school, and fixed effects for county. 95% confidence intervals reflect Huber-White robust standard errors clustered at the state level. Positive values represent increases in life expectancy. Cigarette tax dollars are inflation-adjusted to 2016 year dollars. Speed of adjustment to the long-

term equilibrium, or the error correction speed, is a direct estimate of the speed at which county life expectancy returns to equilibrium after any disturbance from long-run cointegrating relationship.

**Panel B.** Testing for stationarity of log model residuals (Harris-Tzavalis unit-root test for fixed T panels, 1999)

|     |   | <u>Life Expectancy</u> |         | <u>Smoking Prevalence</u> |         |
|-----|---|------------------------|---------|---------------------------|---------|
|     |   | Statistic              | P-Value | Statistic                 | P-Value |
| rho | P | -0.1419                | <0.001  | 0.6907                    | <0.001  |

*Notes:* H0: All panels contain unit roots ( $\rho_i = \rho$  for all  $i$ ); H1: Some panels are stationary ( $\rho < 1$ )

**Table S3.** Association of Cigarette Tax and County-level Life Expectancy by Income Quintile*Panel A.* Association of Cigarette Tax and County-level Life Expectancy by Income Quintile

|                                                           | Life Expectancy (years) |                    |                    |                    |                    |
|-----------------------------------------------------------|-------------------------|--------------------|--------------------|--------------------|--------------------|
|                                                           | Income Q1               | Income Q2          | Income Q3          | Income Q4          | Income Q5          |
| Cigarette Tax (Long Run) (\$/pack)                        | 1.44***<br>(0.35)       | 1.27***<br>(0.18)  | 1.09***<br>(0.18)  | 0.79***<br>(0.27)  | 0.55**<br>(0.28)   |
| Speed of adjustment                                       | -0.10***<br>(0.02)      | -0.11***<br>(0.01) | -0.09***<br>(0.01) | -0.07***<br>(0.01) | -0.05***<br>(0.01) |
| Lag 1 of Life Expectancy (years)                          | -0.14***<br>(0.02)      | -0.15***<br>(0.02) | -0.15***<br>(0.03) | -0.13***<br>(0.02) | -0.13***<br>(0.03) |
| Lag 2 of Life Expectancy (years)                          | 0.04***<br>(0.01)       | 0.05***<br>(0.02)  | 0.03<br>(0.02)     | 0.04***<br>(0.02)  | 0.07***<br>(0.02)  |
| Lag 3 of Life Expectancy (years)                          | -0.03***<br>(0.01)      | -0.00<br>(0.02)    | 0.01<br>(0.02)     | 0.03*<br>(0.02)    | 0.02<br>(0.02)     |
| $\Delta$ Cigarette tax <sub>t</sub> (Short run) (\$/pack) | -0.01<br>(0.05)         | -0.03<br>(0.04)    | -0.03<br>(0.03)    | -0.01<br>(0.02)    | -0.00<br>(0.03)    |
| Share female (%)                                          | 0.44<br>(1.52)          | 2.96***<br>(1.06)  | 0.26<br>(0.72)     | -1.54<br>(1.07)    | -0.49<br>(0.59)    |
| Share under 18 (%)                                        | 0.39<br>(0.63)          | 0.00<br>(0.44)     | 0.27<br>(0.27)     | 0.04<br>(0.30)     | -0.59**<br>(0.24)  |
| Share over 65 (%)                                         | 1.16**<br>(0.46)        | 0.50<br>(0.43)     | 0.32<br>(0.39)     | 0.24<br>(0.17)     | -0.12<br>(0.19)    |
| Share black (%)                                           | -2.73**<br>(1.29)       | -2.12***<br>(0.80) | -2.40*<br>(1.42)   | -2.95<br>(2.09)    | -1.40<br>(1.49)    |
| Share Hispanic (%)                                        | 10.87**<br>(4.46)       | 21.23***<br>(5.19) | -0.09***<br>(0.01) | -0.11***<br>(0.01) | -0.16***<br>(0.02) |
| Share completing high school (%)                          | 26.44***<br>(2.70)      | 0.00<br>(0.00)     | 0.35***<br>(0.09)  | -0.05<br>(0.16)    | 0.61***<br>(0.17)  |
| Income per capita (\$)                                    | 0.00***<br>(0.00)       | 0.00**<br>(0.00)   | 0.00*<br>(0.00)    | 0.00*<br>(0.00)    | 0.00***<br>(0.00)  |
| Constant                                                  | 6.79***<br>(1.28)       | 8.38***<br>(1.06)  | 7.10***<br>(0.84)  | 5.91***<br>(0.78)  | 4.07***<br>(0.54)  |
| Observations                                              | 11913                   | 11932              | 11951              | 11932              | 11932              |

Cluster-robust standard errors in parentheses

\*\*\* p&lt;0.01, \*\* p&lt;0.05, \* p&lt;0.1

*Notes:* Changes in life expectancy from the main regression analysis with adjustment for county-year income per capita, share female, share Black, share over 65, share under 18, and share with high school, and fixed effects for county. Huber-White robust standard errors clustered at the state level. Positive values represent increases in life expectancy. Cigarette tax dollars are inflation-adjusted to 2016 year dollars. Speed of adjustment to the long-term equilibrium, or the error correction speed, is a direct estimate of the speed at which county life expectancy returns to equilibrium after any disturbance from long run cointegrating relationship.

*Panel B.* Testing for a Linear Trend in the Association of Cigarette Tax and County-level Life Expectancy by Income Quintile

|                 | Coefficient | Standard Error | 95% Confidence Interval |
|-----------------|-------------|----------------|-------------------------|
| Income Quintile | -0.23***    | 0.14           | (-0.28, -0.18)          |
| Constant        | 1.73***     | 0.46           | (1.59, 1.88)            |

*Notes:* Results of a weighted linear regression of the estimated long-run association of cigarette tax and county-level life expectancy by income quintile (from Panel A) against income quintile, using the inverse of the variance of the estimated coefficient for the weights.

**Table S4.** Association of Cigarette Tax and County-level Life Expectancy across Rural vs. Urban Counties

|                                                           | Life Expectancy (years) |                    |
|-----------------------------------------------------------|-------------------------|--------------------|
|                                                           | Rural                   | Urban              |
| Cigarette Tax (Long Run) (\$/pack)                        | 1.05***<br>(0.16)       | 0.92***<br>(0.26)  |
| Speed of adjustment                                       | -0.08***<br>(0.01)      | -0.07***<br>(0.01) |
| Lag 1 of Life Expectancy (years)                          | -0.06***<br>(0.01)      | -0.20***<br>(0.01) |
| Lag 2 of Life Expectancy (years)                          | 0.08***<br>(0.01)       | 0.02<br>(0.01)     |
| Lag 3 of Life Expectancy (years)                          | -0.02*<br>(0.01)        | 0.01<br>(0.01)     |
| $\Delta$ Cigarette tax <sub>t</sub> (Short run) (\$/pack) | -0.02<br>(0.03)         | -0.00<br>(0.02)    |
| Share female (%)                                          | 0.32<br>(0.72)          | 0.89<br>(0.97)     |
| Share under 18 (%)                                        | 0.22<br>(0.20)          | -1.14**<br>(0.51)  |
| Share over 65 (%)                                         | 0.04<br>(0.13)          | 1.07***<br>(0.34)  |
| Share black (%)                                           | -2.69**<br>(1.12)       | -1.75*<br>(1.01)   |
| Share Hispanic (%)                                        | -0.09***<br>(0.01)      | -0.13***<br>(0.05) |
| Share completing high school (%)                          | 0.71***<br>(0.16)       | -0.01<br>(0.10)    |
| Income per capita (\$)                                    | 0.00***<br>(0.00)       | 0.00***<br>(0.00)  |
| Constant                                                  | 5.79***<br>(0.64)       | 5.10***<br>(0.81)  |
| Observations                                              | 31,962                  | 27,968             |

Cluster-robust errors in parentheses

\*\*\* p<0.01, \*\* p<0.05, \* p<0.1

*Notes:* Changes in life expectancy from the main regression analysis with adjustment for county-year income per capita, share female, share Black, share over 65, share under 18, and share with high school, and fixed effects for county. Huber-White robust standard errors clustered at the state level. Positive values represent increases in life expectancy. Cigarette tax dollars are inflation-adjusted to 2016 year dollars. Speed of adjustment to the long-term equilibrium, or the

error correction speed, is a direct estimate of the speed at which county life expectancy returns to equilibrium after any disturbance from long run cointegrating relationship.

**Table S5.** Association of Cigarette Tax and Smoking Prevalence

|                                                           | Smoking Prevalence (%) |                    |                      |
|-----------------------------------------------------------|------------------------|--------------------|----------------------|
|                                                           | Overall                | Male               | Female               |
| Cigarette Tax (Long Run) (\$/pack)                        | -3.09***<br>(0.35)     | -3.30***<br>(0.41) | -2.39***<br>(0.19)   |
| Speed of adjustment                                       | -0.21***<br>(0.02)     | -0.20***<br>(0.02) | -0.30***<br>(0.02)   |
| Lag 1 of Smoking Prevalence (%)                           | 0.05**<br>(0.03)       | 0.04<br>(0.03)     | 0.14***<br>(0.01)    |
| Lag 2 of Smoking Prevalence (%)                           | 0.15***<br>(0.02)      | 0.11***<br>(0.02)  | 0.19***<br>(0.01)    |
| Lag 3 of Smoking Prevalence (%)                           | 0.10***<br>(0.03)      | 0.06***<br>(0.02)  | 0.13***<br>(0.02)    |
| $\Delta$ Cigarette tax <sub>t</sub> (Short run) (\$/pack) | 0.42***<br>(0.09)      | 0.44***<br>(0.10)  | 0.49***<br>(0.09)    |
| Share female (%)                                          | 0.70<br>(2.63)         | 0.78<br>(3.46)     | -0.01<br>(2.34)      |
| Share under 18 (%)                                        | -2.46<br>(1.50)        | -1.94<br>(1.67)    | -3.30<br>(2.02)      |
| Share over 65 (%)                                         | -3.37***<br>(1.27)     | -3.30**<br>(1.37)  | -4.41***<br>(1.69)   |
| Share black (%)                                           | 5.01<br>(3.18)         | 9.03**<br>(4.20)   | 3.79<br>(2.60)       |
| Share Hispanic (%)                                        | -10.85<br>(10.93)      | -15.45<br>(10.94)  | -1.48<br>(13.18)     |
| Share completing high school (%)                          | 60.22**<br>(26.97)     | 12.42<br>(60.66)   | 126.22***<br>(19.24) |
| Income per capita (\$)                                    | 0.00<br>(0.00)         | 0.00<br>(0.00)     | 0.00<br>(0.00)       |
| Constant                                                  | 5.39***<br>(0.49)      | 5.83***<br>(0.62)  | 6.98***<br>(0.42)    |
| Observations                                              | 52,462                 | 52,462             | 52,462               |

Cluster-robust errors in parentheses

\*\*\* p&lt;0.01, \*\* p&lt;0.05, \* p&lt;0.1

*Notes:* Changes in smoking prevalence from the main regression analysis with adjustment for county-year income per capita, share female, share Black, share over 65, share under 18, and share with high school, and fixed effects for county. 95% confidence intervals reflect Huber-White robust standard errors clustered at the state level. Negative values represent reductions in smoking prevalence. Cigarette tax dollars are inflation-adjusted to 2016 year dollars. Speed of adjustment to the long-term equilibrium, or the error correction speed, is a direct estimate of the

speed at which county smoking prevalence returns to equilibrium after any disturbance from long run cointegrating relationship.

**Table S6.** Association of Cigarette Tax and County-level Smoking Prevalence (%) by Income Quintile

|                                                           | Smoking Prevalence (%) |                    |                    |                      |                     |
|-----------------------------------------------------------|------------------------|--------------------|--------------------|----------------------|---------------------|
|                                                           | Income Q1              | Income Q2          | Income Q3          | Income Q4            | Income Q5           |
| Cigarette Tax (Long Run) (\$/pack)                        | -3.51***<br>(0.73)     | -4.00***<br>(0.63) | -3.78***<br>(0.40) | -2.54***<br>(0.33)   | -2.69***<br>(0.36)  |
| Speed of adjustment                                       | -0.31***<br>(0.02)     | -0.22***<br>(0.02) | -0.18***<br>(0.02) | -0.20***<br>(0.02)   | -0.17***<br>(0.03)  |
| Lag 1 of Smoking Prevalence (%)                           | 0.05<br>(0.04)         | 0.03<br>(0.04)     | 0.05**<br>(0.03)   | 0.08***<br>(0.02)    | 0.03<br>(0.02)      |
| Lag 2 of Smoking Prevalence (%)                           | 0.18***<br>(0.05)      | 0.14***<br>(0.03)  | 0.10***<br>(0.02)  | 0.11***<br>(0.03)    | 0.13***<br>(0.03)   |
| Lag 3 of Smoking Prevalence (%)                           | 0.11*<br>(0.06)        | 0.09**<br>(0.03)   | 0.10***<br>(0.03)  | 0.12***<br>(0.03)    | 0.08**<br>(0.03)    |
| $\Delta$ Cigarette tax <sub>t</sub> (Short run) (\$/pack) | 0.65***<br>(0.22)      | 0.61***<br>(0.15)  | 0.51***<br>(0.09)  | 0.37***<br>(0.09)    | 0.20**<br>(0.08)    |
| Share female (%)                                          | -0.54<br>(5.13)        | 0.76<br>(3.65)     | -1.67<br>(4.93)    | 5.50*<br>(3.34)      | 0.33<br>(3.34)      |
| Share under 18 (%)                                        | 1.22<br>(3.51)         | -1.16<br>(2.02)    | -4.74**<br>(2.42)  | -2.84<br>(2.12)      | -3.72<br>(3.49)     |
| Share over 65 (%)                                         | -0.76<br>(2.28)        | -2.44<br>(1.81)    | -4.89*<br>(2.90)   | -3.21*<br>(1.91)     | -2.68*<br>(1.44)    |
| Share black (%)                                           | 7.82*<br>(4.26)        | 4.85<br>(4.38)     | 5.67<br>(7.69)     | 18.75<br>(17.09)     | -24.68<br>(18.77)   |
| Share Hispanic (%)                                        | 2.77<br>(18.93)        | -26.07<br>(33.43)  | -20.55*<br>(11.99) | -3.24<br>(13.11)     | 1.08<br>(14.40)     |
| Share completing high school (%)                          | -2.21<br>(60.48)       | 0.00<br>(0.00)     | 0.00<br>(0.00)     | 371.83***<br>(52.33) | 82.33***<br>(25.83) |
| Income per capita (\$)                                    | 0.00**<br>(0.00)       | 0.00<br>(0.00)     | 0.00<br>(0.00)     | 0.00<br>(0.00)       | 0.00**<br>(0.00)    |
| Constant                                                  | 9.54***<br>(0.82)      | 6.47***<br>(0.56)  | 5.01***<br>(0.48)  | 3.33***<br>(0.47)    | 3.70***<br>(0.66)   |
| Observations                                              | 10,421                 | 10,567             | 10,510             | 10,476               | 10,488              |

Clustered-standard errors in parentheses

\*\*\* p&lt;0.01, \*\* p&lt;0.05, \* p&lt;0.1

*Notes:* Changes in smoking prevalence from the main regression analysis with adjustment for county-year income per capita, share female, share Black, share over 65, share under 18, and share with high school, and fixed effects for county. 95% confidence intervals reflect Huber-White robust standard errors clustered at the state level. Negative values represent reductions in smoking prevalence. Cigarette tax dollars are inflation-adjusted to 2016 year dollars. Speed of adjustment to the long-term equilibrium, or the error correction speed, is a direct estimate of the speed at which county smoking prevalence returns to equilibrium after any disturbance from long run cointegrating relationship.

**Table S7.** Association of Cigarette Tax and Smoking prevalence (%) by urban/rural status*Panel A.* Including All States

|                                                           | Smoking Prevalence (%) |                    |
|-----------------------------------------------------------|------------------------|--------------------|
|                                                           | Rural                  | Urban              |
| Cigarette Tax (Long Run) (\$/pack)                        | -2.71***<br>(0.35)     | -3.47***<br>(0.43) |
| Speed of adjustment                                       | -0.25***<br>(0.01)     | -0.17***<br>(0.02) |
| Lag 1 of Smoking Prevalence (%)                           | 0.06**<br>(0.02)       | 0.06*<br>(0.03)    |
| Lag 2 of Smoking Prevalence (%)                           | 0.16***<br>(0.02)      | 0.14***<br>(0.03)  |
| Lag 3 of Smoking Prevalence (%)                           | 0.12***<br>(0.03)      | 0.09**<br>(0.03)   |
| $\Delta$ Cigarette tax <sub>t</sub> (Short run) (\$/pack) | 0.43***<br>(0.10)      | 0.40***<br>(0.09)  |
| Share female (%)                                          | 2.69<br>(2.62)         | -3.57<br>(3.68)    |
| Share under 18 (%)                                        | -3.88**<br>(1.80)      | 0.90<br>(1.89)     |
| Share over 65 (%)                                         | -3.05*<br>(1.66)       | -4.27**<br>(2.11)  |
| Share black (%)                                           | 9.21**<br>(3.61)       | 0.10<br>(3.62)     |
| Share Hispanic (%)                                        | -10.45<br>(11.67)      | -13.60<br>(14.29)  |
| Share completing high school (%)                          | 59.07<br>(37.66)       | 0.00<br>(0.00)     |
| Income per capita (\$)                                    | 0.00*<br>(0.00)        | 0.00<br>(0.00)     |
| Constant                                                  | 6.60***<br>(0.43)      | 4.66***<br>(0.58)  |
| Observations                                              | 28,101                 | 24,361             |

Cluster-robust errors in parentheses

\*\*\* p&lt;0.01, \*\* p&lt;0.05, \* p&lt;0.1

*Notes:* Changes in smoking prevalence from the main regression analysis with adjustment for county-year income per capita, share female, share Black, share over 65, share under 18, and share with high school, and fixed effects for county. 95% confidence intervals reflect Huber-White robust standard errors clustered at the state level. Negative values represent reductions in

smoking prevalence. Cigarette tax dollars are inflation-adjusted to 2016 year dollars. Speed of adjustment to the long-term equilibrium, or the error correction speed, is a direct estimate of the speed at which county smoking prevalence returns to equilibrium after any disturbance from long run cointegrating relationship.

*Panel B. Removing States where Local Cigarette Taxes were in Effect*

|                                                           | Smoking Prevalence (%) |                    |
|-----------------------------------------------------------|------------------------|--------------------|
|                                                           | Rural                  | Urban              |
| Cigarette Tax (Long Run) (\$/pack)                        | -2.71***<br>(0.39)     | -3.74***<br>(0.47) |
| Speed of adjustment                                       | -0.24***<br>(0.02)     | -0.16***<br>(0.02) |
| Lag 1 of Smoking Prevalence (%)                           | 0.06**<br>(0.03)       | 0.04<br>(0.04)     |
| Lag 2 of Smoking Prevalence (%)                           | 0.16***<br>(0.02)      | 0.14***<br>(0.03)  |
| Lag 3 of Smoking Prevalence (%)                           | 0.11***<br>(0.03)      | 0.06*<br>(0.04)    |
| $\Delta$ Cigarette tax <sub>t</sub> (Short run) (\$/pack) | 0.39***<br>(0.10)      | 0.35***<br>(0.07)  |
| Share female (%)                                          | 2.85<br>(2.96)         | -3.66<br>(3.59)    |
| Share under 18 (%)                                        | -4.45**<br>(2.06)      | 0.57<br>(2.14)     |
| Share over 65 (%)                                         | -3.27*<br>(1.87)       | -4.34*<br>(2.34)   |
| Share black (%)                                           | 11.26***<br>(3.50)     | -0.79<br>(3.64)    |
| Share Hispanic (%)                                        | -14.20<br>(11.61)      | -8.89<br>(15.54)   |
| Share completing high school (%)                          | 34.24<br>(37.88)       | 0.00<br>(0.00)     |
| Income per capita (\$)                                    | 0.00<br>(0.00)         | 0.00<br>(0.00)     |
| Constant                                                  | 6.61***<br>(0.48)      | 4.40***<br>(0.66)  |
| Observations                                              | 24,395                 | 18,921             |

The following states were removed because they allow for local preemption of cigarette taxes: AL, AK, CO, IL, LA, NY, OH, PA, VA. Changes in smoking prevalence from the main regression analysis with adjustment for county-year income per capita, share female, share Black, share over 65, share under 18, and share with high school, and fixed effects for county. 95% confidence intervals reflect Huber-White robust standard errors clustered at the state level.

Negative values represent reductions in smoking prevalence. Cigarette tax dollars are inflation-adjusted to 2016 year dollars. Speed of adjustment to the long-term equilibrium, or the error correction speed, is a direct estimate of the speed at which county smoking prevalence returns to equilibrium after any disturbance from long run cointegrating relationship.

**Table S8.** Null Hypothesis Rejections for Mortality Rate Changes By Cause Of Death

|                                               | Coefficient  | Std. Error  | T-Stat       | P-Value         |
|-----------------------------------------------|--------------|-------------|--------------|-----------------|
| <i>CVD Related Causes of Death</i>            |              |             |              |                 |
| <b>Peripheral vascular disease</b>            | <b>-0.09</b> | <b>0.01</b> | <b>-6.21</b> | <b>5.23E-10</b> |
| <b>Ischemic stroke</b>                        | <b>-3.01</b> | <b>0.84</b> | <b>-3.57</b> | <b>0.000353</b> |
| <b>Cerebrovascular disease</b>                | <b>-3.98</b> | <b>1.15</b> | <b>-3.47</b> | <b>0.000516</b> |
| <b>Hemorrhagic stroke</b>                     | <b>-1.04</b> | <b>0.35</b> | <b>-3.02</b> | <b>0.002497</b> |
| <b>Endocarditis</b>                           | <b>-0.08</b> | <b>0.03</b> | <b>-2.90</b> | <b>0.003677</b> |
| <b>Ischemic heart disease</b>                 | <b>-9.33</b> | <b>3.42</b> | <b>-2.73</b> | <b>0.006316</b> |
| Rheumatic heart disease                       | -0.16        | 0.07        | -2.35        | 0.018639        |
| Hypertensive heart disease                    | 0.58         | 0.26        | 2.22         | 0.02638         |
| Aortic aneurysm                               | -0.22        | 0.11        | -2.04        | 0.041691        |
| Atrial fibrillation and flutter               | -0.11        | 0.07        | -1.64        | 0.101172        |
| Other cardiovascular and circulatory diseases | -0.15        | 0.12        | -1.28        | 0.201232        |
| Cardiomyopathy and myocarditis                | -0.16        | 0.17        | -0.97        | 0.333526        |
| <i>Cancer-related Causes of Death</i>         |              |             |              |                 |
| <b>Non-melanoma skin cancer</b>               | <b>0.05</b>  | <b>0.01</b> | <b>5.44</b>  | <b>5.45E-08</b> |
| <b>Leukemia</b>                               | <b>-0.20</b> | <b>0.04</b> | <b>-5.36</b> | <b>8.13E-08</b> |
| <b>Chronic lymphoid leukemia</b>              | <b>-0.11</b> | <b>0.02</b> | <b>-4.41</b> | <b>1.02E-05</b> |
| <b>Acute lymphoid leukemia</b>                | <b>-0.05</b> | <b>0.01</b> | <b>-4.37</b> | <b>1.23E-05</b> |
| <b>Ovarian cancer</b>                         | <b>-1.63</b> | <b>0.41</b> | <b>-4.00</b> | <b>6.44E-05</b> |
| <b>Non-Hodgkin lymphoma</b>                   | <b>-0.26</b> | <b>0.07</b> | <b>-3.95</b> | <b>7.73E-05</b> |
| <b>Other neoplasms</b>                        | <b>0.19</b>  | <b>0.05</b> | <b>3.95</b>  | <b>7.86E-05</b> |
| <b>Larynx cancer</b>                          | <b>-0.76</b> | <b>0.19</b> | <b>-3.92</b> | <b>8.93E-05</b> |
| <b>Colon and rectum cancer</b>                | <b>-0.82</b> | <b>0.23</b> | <b>-3.61</b> | <b>0.000305</b> |
| <b>Tracheal, bronchus, and lung cancer</b>    | <b>-2.77</b> | <b>0.83</b> | <b>-3.34</b> | <b>0.000839</b> |
| <b>Other pharynx cancer</b>                   | <b>0.08</b>  | <b>0.03</b> | <b>2.92</b>  | <b>0.003556</b> |
| <b>Hodgkin lymphoma</b>                       | <b>-0.03</b> | <b>0.01</b> | <b>-2.90</b> | <b>0.003676</b> |
| Pancreatic cancer                             | -0.11        | 0.04        | -2.73        | 0.006338        |
| Brain and nervous system cancer               | 0.13         | 0.05        | 2.67         | 0.007679        |
| Esophageal cancer                             | -0.18        | 0.07        | -2.34        | 0.019091        |
| Stomach cancer                                | -0.23        | 0.10        | -2.32        | 0.02032         |
| Multiple myeloma                              | -0.09        | 0.04        | -2.24        | 0.025295        |
| Testicular cancer                             | 0.01         | 0.00        | 2.18         | 0.02927         |
| Bladder cancer                                | -0.03        | 0.02        | -1.62        | 0.104186        |
| Breast cancer                                 | -0.27        | 0.17        | -1.62        | 0.105191        |
| Uterine cancer                                | -0.02        | 0.01        | -1.57        | 0.116519        |
| Gallbladder and biliary tract cancer          | -0.05        | 0.03        | -1.56        | 0.119932        |
| Nasopharynx cancer                            | 0.00         | 0.00        | -1.54        | 0.124416        |
| Prostate cancer                               | -0.17        | 0.12        | -1.46        | 0.14352         |
| Malignant skin melanoma                       | -0.03        | 0.02        | -1.11        | 0.268482        |

|                                                     |              |             |              |                 |
|-----------------------------------------------------|--------------|-------------|--------------|-----------------|
| Liver cancer                                        | 0.06         | 0.06        | 0.99         | 0.321587        |
| Thyroid cancer                                      | 0.00         | 0.00        | -0.83        | 0.407982        |
| Cervical cancer                                     | -0.01        | 0.02        | -0.67        | 0.500631        |
| Acute myeloid leukemia                              | 0.01         | 0.02        | 0.62         | 0.53414         |
| Lip and oral cavity cancer                          | 0.01         | 0.02        | 0.46         | 0.643074        |
| Chronic myeloid leukemia                            | 0.00         | 0.01        | 0.39         | 0.699233        |
| Kidney cancer                                       | -0.02        | 0.06        | -0.35        | 0.726751        |
| <i>Respiratory Disease Related Causes of Death</i>  |              |             |              |                 |
| <b>Other pneumoconiosis</b>                         | <b>-0.01</b> | <b>0.00</b> | <b>-4.74</b> | <b>2.12E-06</b> |
| <b>Pneumoconiosis</b>                               | <b>-0.21</b> | <b>0.06</b> | <b>-3.35</b> | <b>0.000801</b> |
| <b>Silicosis</b>                                    | <b>-0.01</b> | <b>0.00</b> | <b>-3.11</b> | <b>0.001893</b> |
| Chronic obstructive pulmonary disease               | -1.82        | 0.74        | -2.47        | 0.01345         |
| Asbestosis                                          | -0.03        | 0.01        | -2.11        | 0.034679        |
| Mesothelioma                                        | 0.05         | 0.03        | 1.69         | 0.09156         |
| Other chronic respiratory diseases                  | -0.01        | 0.01        | -1.54        | 0.124122        |
| Interstitial lung disease and pulmonary sarcoidosis | 0.03         | 0.02        | 1.39         | 0.165975        |
| Asthma                                              | -0.03        | 0.03        | -1.04        | 0.298756        |
| Coal workers pneumoconiosis                         | -0.01        | 0.02        | -0.72        | 0.470554        |
| <i>Injury Related Causes of Death</i>               |              |             |              |                 |
| <b>Self-harm</b>                                    | <b>3.40</b>  | <b>0.95</b> | <b>3.58</b>  | <b>0.000348</b> |
| Interpersonal violence                              | -0.23        | 0.10        | -2.32        | 0.02058         |
| Alcohol use disorders                               | 0.01         | 0.05        | 0.21         | 0.831246        |
| Drug use disorders                                  | -0.01        | 0.52        | -0.03        | 0.978364        |

*Notes:* Lists of the conditions for which the null hypothesis of no effect was rejected are in bold, organized by major cause of death category. We used the adaptive Holm step-down procedure for multiple test adjustment by major cause of death category (cardiovascular, cancer, respiratory conditions, and injury related). The conservative assumption was made that the tests between major types of disease were independent, and a Bonferroni adjustment was used to adjust the overall significance level of 0.05 over all tests performed for all 58 conditions. For each major cause of death category the Bonferroni adjusted significance level was  $0.05/4 = 0.0125$  over all the tests in that category. The analysis used the SAS multtest procedure.

**Table S9.** Sensitivity Analysis: Association of Cigarette Tax and County-level Life Expectancy using Lag Orders of 1 – 5 years

|                                                           | Life Expectancy (years) using Lag Order of 1 to 5 |                    |                    |                    |                    |
|-----------------------------------------------------------|---------------------------------------------------|--------------------|--------------------|--------------------|--------------------|
| Cigarette Tax (Long Run) (\$/pack)                        | 1.07***<br>(0.19)                                 | 1.30***<br>(0.23)  | 1.00***<br>(0.20)  | 0.66***<br>(0.17)  | 0.30**<br>(0.12)   |
| Speed of adjustment                                       | -0.06***<br>(0.01)                                | -0.06***<br>(0.01) | -0.07***<br>(0.01) | -0.08***<br>(0.01) | -0.12***<br>(0.01) |
| Lag 1 of Life Expectancy (years)                          | -0.14***<br>(0.01)                                | -0.18***<br>(0.01) | -0.14***<br>(0.01) | -0.17***<br>(0.01) | -0.22***<br>(0.01) |
| Lag 2 of Life Expectancy (years)                          |                                                   | -0.02***<br>(0.01) | 0.05***<br>(0.01)  | 0.10***<br>(0.01)  | 0.09***<br>(0.01)  |
| Lag 3 of Life Expectancy (years)                          |                                                   |                    | -0.00<br>(0.01)    | 0.07***<br>(0.01)  | 0.16***<br>(0.01)  |
| Lag 4 of Life Expectancy (years)                          |                                                   |                    |                    | -0.18***<br>(0.01) | -0.03**<br>(0.01)  |
| Lag 5 of Life Expectancy (years)                          |                                                   |                    |                    |                    | -0.14***<br>(0.01) |
| $\Delta$ Cigarette tax <sub>t</sub> (Short run) (\$/pack) | -0.01<br>(0.02)                                   | -0.01<br>(0.03)    | -0.01<br>(0.03)    | -0.02<br>(0.02)    | -0.03<br>(0.02)    |
| Share female (%)                                          | 0.62<br>(0.63)                                    | 0.45<br>(0.67)     | 0.46<br>(0.64)     | 0.48<br>(0.61)     | 0.67<br>(0.52)     |
| Share under 18 (%)                                        | -0.10<br>(0.27)                                   | -0.22<br>(0.30)    | -0.11<br>(0.27)    | -0.12<br>(0.21)    | -0.01<br>(0.19)    |
| Share over 65 (%)                                         | 0.29**<br>(0.15)                                  | 0.24<br>(0.15)     | 0.32**<br>(0.14)   | 0.34***<br>(0.13)  | 0.36***<br>(0.11)  |
| Share black (%)                                           | -2.32***<br>(0.64)                                | -2.50***<br>(0.77) | -2.40***<br>(0.73) | -2.21***<br>(0.65) | -2.21***<br>(0.47) |
| Share Hispanic (%)                                        | -0.10***<br>(0.02)                                | -0.09***<br>(0.02) | -0.10***<br>(0.02) | -0.13***<br>(0.02) | -0.12***<br>(0.01) |
| Share completing high school (%)                          | 0.63***<br>(0.18)                                 | 0.66**<br>(0.32)   | 0.46*<br>(0.24)    | -0.04<br>(0.14)    | -0.22**<br>(0.10)  |
| Income per capita (\$)                                    | 0.00***<br>(0.00)                                 | 0.00***<br>(0.00)  | 0.00***<br>(0.00)  | 0.00***<br>(0.00)  | 0.00***<br>(0.00)  |
| Constant                                                  | 4.84***<br>(0.68)                                 | 4.33***<br>(0.71)  | 5.44***<br>(0.69)  | 6.42***<br>(0.64)  | 9.07***<br>(0.56)  |

Cluster-robust errors in parentheses

\*\*\* p&lt;0.01, \*\* p&lt;0.05, \* p&lt;0.1

*Notes:* Changes in life expectancy from the main regression analysis with adjustment for county-year income per capita, share female, share Black, share over 65, share under 18, and share with high school, and fixed effects for county. Huber-White robust standard errors clustered at the

state level. Positive values represent increases in life expectancy. Cigarette tax dollars are inflation-adjusted to 2016 year dollars. Speed of adjustment to the long-term equilibrium, or the error correction speed, is a direct estimate of the speed at which county life expectancy returns to equilibrium after any disturbance from long run cointegrating relationship.

**Table S10.** Dynamic instrumental variables panel model

| System GMM Estimator             |                               |
|----------------------------------|-------------------------------|
|                                  | Life<br>Expectancy<br>(years) |
| Cigarette Tax (Long Run)         | 0.30**<br>(0.14)              |
| Lag 1 of Life Expectancy         | 0.49***<br>(0.06)             |
| Lag 2 of Life Expectancy         | 0.05<br>(0.05)                |
| Lag 3 of Life Expectancy         | 0.03<br>(0.05)                |
| Lag 4 of Life Expectancy         | -0.30***<br>(0.05)            |
| Cigarette Tax (Short Run)        | 0.14***<br>(0.05)             |
| Time trend                       | 0.10**<br>(0.04)              |
| Share female (%)                 | -33.83<br>(24.48)             |
| Share under 18 (%)               | -8.37**<br>(3.21)             |
| Share over 65 (%)                | -3.36<br>(7.12)               |
| Share Black (%)                  | 13.14<br>(21.58)              |
| Share Hispanic (%)               | 1.07<br>(2.65)                |
| Share Completing High School (%) | -6.20<br>(6.43)               |
| Income per Capita (\$)           | -0.00<br>(0.00)               |
| Observations                     | 43,377                        |

Cluster-robust errors in parentheses

\*\*\* p&lt;0.01, \*\* p&lt;0.05, \* p&lt;0.1

*Notes:* We implemented the regression: “xtabond2 leBoth L(1/4).leBoth cigtax t ifemale iunder18 iover65 iblack ihisp iHS incomepc\_d, noleveleq ivstyle(cigtax t, passthru) gmmstyle(L(1/4).leBoth, lag(1 3)) gmmstyle(ifemale iunder18 iover65 iblack ihisp iHS incomepc\_d) pca cluster(state\_fips) small twostep robust”, which fits a dynamic panel model based Blundell and Bond (37), which relaxes the assumption of strongly exogenous covariates by using lags (of order 2 and greater) as instrumental variables and which was designed for small-T, large-N datasets. We take cigarette taxes as strongly exogenous and the other time-varying covariates are considered predetermined (meaning are potentially correlated with past errors). The key assumptions of the model were met: (1) the Arellano-Bond test for autocorrelation, which would indicate that lags of the dependent variable are endogenous: we reject the null of AR(1) residuals ( $P < 0.001$ ); we cannot reject the null AR(2) residuals ( $P = 0.101$ ); and (2) tests of whether the instruments, as a group, appear exogenous: we reject the null of overidentified restrictions (Hansen J statistic  $P$  value = 0.361). We report the finite-sample corrected standard errors based on the two-step covariance matrix.

**Table S11.** Correlation of residuals and time-varying covariates

|                          | Share<br>Female<br>(%) | Share<br>Under<br>18 | Share<br>Over<br>65 | Share<br>Black | Share<br>Hispani<br>c | Share<br>Completing<br>High School | Income<br>per<br>capita |
|--------------------------|------------------------|----------------------|---------------------|----------------|-----------------------|------------------------------------|-------------------------|
| Residuals of<br>main ECM | -0.01                  | 0.06                 | 0.06                | 0.05           | 0.01                  | -0.11                              | -0.03                   |

**Table S12.** Sensitivity Analysis: Association of Cigarette Tax and County-level Life Expectancy after Removing States where Local Cigarette Taxes are in Effect

|                                                           | Life Expectancy (years) |                    |                    |
|-----------------------------------------------------------|-------------------------|--------------------|--------------------|
|                                                           | Overall                 | Males              | Females            |
| Cigarette Tax (Long Run) (\$/pack)                        | 1.08***<br>(0.17)       | 1.31***<br>(0.19)  | 0.83***<br>(0.13)  |
| Speed of adjustment                                       | -0.08***<br>(0.01)      | -0.07***<br>(0.01) | -0.10***<br>(0.01) |
| Lag 1 of Life Expectancy (years)                          | -0.13***<br>(0.02)      | -0.27***<br>(0.01) | -0.15***<br>(0.02) |
| Lag 2 of Life Expectancy (years)                          | 0.06***<br>(0.01)       | -0.08***<br>(0.01) | 0.11***<br>(0.01)  |
| Lag 3 of Life Expectancy (years)                          | -0.01<br>(0.01)         | -0.05***<br>(0.01) | 0.09***<br>(0.01)  |
| $\Delta$ Cigarette tax <sub>t</sub> (Short run) (\$/pack) | -0.01<br>(0.03)         | -0.02<br>(0.03)    | -0.01<br>(0.02)    |
| Share female (%)                                          | 0.69<br>(0.72)          | -0.41<br>(0.85)    | 0.26<br>(0.48)     |
| Share under 18 (%)                                        | -0.08<br>(0.33)         | -0.15<br>(0.42)    | 0.22<br>(0.32)     |
| Share over 65 (%)                                         | 0.32**<br>(0.15)        | 0.30*<br>(0.18)    | 0.50***<br>(0.18)  |
| Share black (%)                                           | -2.55***<br>(0.87)      | -2.72**<br>(1.18)  | -1.80***<br>(0.65) |
| Share Hispanic (%)                                        | 10.63***<br>(3.36)      | 6.86**<br>(2.70)   | 12.26***<br>(3.49) |
| Share completing high school (%)                          | 10.27**<br>(5.05)       | 8.22***<br>(1.25)  | 5.27*<br>(2.75)    |
| Income per capita (\$)                                    | 0.00***<br>(0.00)       | -0.00*<br>(0.00)   | 0.00***<br>(0.00)  |
| Constant                                                  | 5.76***                 | 5.51***            | 8.12***            |

Cluster-robust standard errors in parentheses

\*\*\* p&lt;0.01, \*\* p&lt;0.05, \* p&lt;0.1

*Notes:* The following states were removed because they allow for local preemption of cigarette taxes: AL, AK, CO, IL, LA, NY, OH, PA, VA. Changes in life expectancy from the main regression analysis with adjustment for county-year income per capita, share female, share Black, share over 65, share under 18, and share with high school, and fixed effects for county. Huber-White robust standard errors clustered at the state level. Positive values represent increases in life expectancy. Cigarette tax dollars are inflation-adjusted to 2016 year dollars. Speed of adjustment to the long-term equilibrium, or the error correction speed, is a direct

estimate of the speed at which county life expectancy returns to equilibrium after any disturbance from long run cointegrating relationship.

**Table S13.** Sensitivity Analysis: Legal Restrictions on Smoking*Panel A.* Correlation between Cigarettes Taxes per Pack of 20 and Smoking Restrictions

| County-Year Smoking Restriction | State-Year Cigarette Tax |
|---------------------------------|--------------------------|
| Bar restriction                 | 0.27                     |
| Restaurant restriction          | 0.22                     |
| Workplace restriction           | 0.21                     |

*Panel B.* R<sup>2</sup> from a Linear Regression of Cigarette Taxes and Smoking Restrictions

| County-Year Variables  | State-Year Cigarette Tax |
|------------------------|--------------------------|
| Bar restriction        | 0.72***<br>(0.04)        |
| Restaurant restriction | -0.15***<br>(0.03)       |
| Workplace restriction  | 0.29***<br>(0.03)        |
| Constant               | 0.70***<br>(0.01)        |
| R-squared              | 0.07                     |
| Observations           | 50,192                   |

Cluster-robust standard errors in parentheses

\*\*\* p&lt;0.01, \*\* p&lt;0.05, \* p&lt;0.1

*Panel C.* Sensitivity analysis: main error-correction-model with annual state-level smoking restrictions included as time-varying covariates

|                                                           | Life Expectancy (years) |
|-----------------------------------------------------------|-------------------------|
| Cigarette Tax (Long Run) (\$/pack)                        | 0.97***<br>(0.20)       |
| Speed of adjustment                                       | -0.07***<br>(0.01)      |
| Lag 1 of Life Expectancy (years)                          | -0.14***<br>(0.01)      |
| Lag 2 of Life Expectancy (years)                          | 0.05***<br>(0.01)       |
| Lag 3 of Life Expectancy (years)                          | -0.01<br>(0.01)         |
| $\Delta$ Cigarette tax <sub>t</sub> (Short run) (\$/pack) | -0.01<br>(0.02)         |
| Share female (%)                                          | 0.52<br>(0.62)          |
| Share under 18 (%)                                        | -0.15<br>(0.28)         |
| Share over 65 (%)                                         | 0.32**<br>(0.14)        |
| Share black (%)                                           | -2.49***<br>(0.74)      |
| Share Hispanic (%)                                        | -0.10***<br>(0.02)      |
| Share completing high school (%)                          | 0.43<br>(0.26)          |
| Income per capita (\$)                                    | 0.00***<br>(0.00)       |
| Worksite ban                                              | -0.00<br>(0.02)         |
| Restaurant ban                                            | 0.03<br>(0.04)          |
| Bar ban                                                   | 0.05<br>(0.04)          |
| Constant                                                  | 5.40***<br>(0.68)       |

Cluster-robust standard errors in parentheses

\*\*\* p<0.01, \*\* p<0.05, \* p<0.1

**Table S14.** Assessing Plausibility of a Causal Interpretation for the Observed Long-run Association of Cigarette Tax and County-level Life Expectancy*Panel A.* Smoking Prevalence as a Mediator: Long-run Association of County-level Smoking Prevalence and County-level Life Expectancy

|                                             | Life Expectancy (Years) |
|---------------------------------------------|-------------------------|
| Smoking Prevalence (Long Run) (%)           | -0.79***<br>(0.13)      |
| Speed of adjustment                         | -0.04***<br>(0.01)      |
| Lag 1 of Life Expectancy (years)            | -0.28***<br>(0.02)      |
| Lag 2 of Life Expectancy (years)            | -0.20***<br>(0.01)      |
| Lag 3 of Life Expectancy (years)            | -0.12***<br>(0.01)      |
| $\Delta$ Smoking Prevalence (Short run) (%) | -0.08***<br>(0.02)      |
| Share female (%)                            | 0.55<br>(0.58)          |
| Share under 18 (%)                          | 0.08<br>(0.26)          |
| Share over 65 (%)                           | 0.29*<br>(0.15)         |
| Share black (%)                             | -0.60<br>(1.01)         |
| Share Hispanic (%)                          | 7.06***<br>(2.10)       |
| Share completing high school (%)            | 46.07***<br>(15.83)     |
| Income per capita (\$)                      | -0.00<br>(0.00)         |
| Constant                                    | 4.17***<br>(1.18)       |
| Observations                                | 52,462                  |

Cluster-robust errors in parentheses

\*\*\* p&lt;0.01, \*\* p&lt;0.05, \* p&lt;0.1

*Notes:* Changes in life expectancy from the main regression analysis with adjustment for county-year smoking prevalence, county-year income per capita, share female, share Black, share over 65, share under 18, and share with high school, and fixed effects for county. 95% confidence

intervals reflect Huber-White robust standard errors clustered at the state level. Positive values represent increases in life expectancy. Cigarette tax dollars are inflation-adjusted to 2016 year dollars. Speed of adjustment to the long-term equilibrium, or the error correction speed, is a direct estimate of the speed at which county life expectancy returns to equilibrium after any disturbance from long-run cointegrating relationship.

*Panel B.* Placebo Test of Association between Future Cigarette Taxes (t+5), Current life expectancy(t), and Current Smoking Prevalence(t)

|                                  | Life Expectancy (t) (Years) | Smoking Prevalence (t) (%) |
|----------------------------------|-----------------------------|----------------------------|
| Cigarette Tax (t+5) (\$/pack)    | 0.09<br>(0.06)              | 0.03<br>(0.16)             |
| Share female (%)                 | 0.69<br>(0.60)              | -0.11<br>(2.63)            |
| Share under 18 (%)               | -3.72***<br>(0.92)          | -4.78*<br>(2.44)           |
| Share over 65 (%)                | 2.08***<br>(0.76)           | -10.16***<br>(2.10)        |
| Share black (%)                  | -2.69**<br>(1.03)           | -6.07<br>(4.51)            |
| Share Hispanic (%)               | 3.60*<br>(1.96)             | -22.99***<br>(4.15)        |
| Share completing high school (%) | -2.11***<br>(0.77)          | -3.65<br>(2.27)            |
| Income per capita (\$)           | 0.00***<br>(0.00)           | -0.00<br>(0.00)            |
| Observations                     | 36,602                      | 36,602                     |

Cluster-robust errors in parentheses

\*\*\* p<0.01, \*\* p<0.05, \* p<0.1

*Notes:* Results of a linear regression of current year life expectancy (or smoking prevalence) with adjustment for state-year cigarette taxes five years later (t+5), county-year income per capita, share female, share Black, share over 65, share under 18, and share with high school, and fixed effects for county. 95% confidence intervals reflect Huber-White robust standard errors clustered at the state level. Cigarette tax dollars are inflation-adjusted to 2016 year dollars.

**Figure S1.** Geographic variation in state cigarette tax rates

Panel A. Average cigarette tax (\$ per pack) by state during the study period

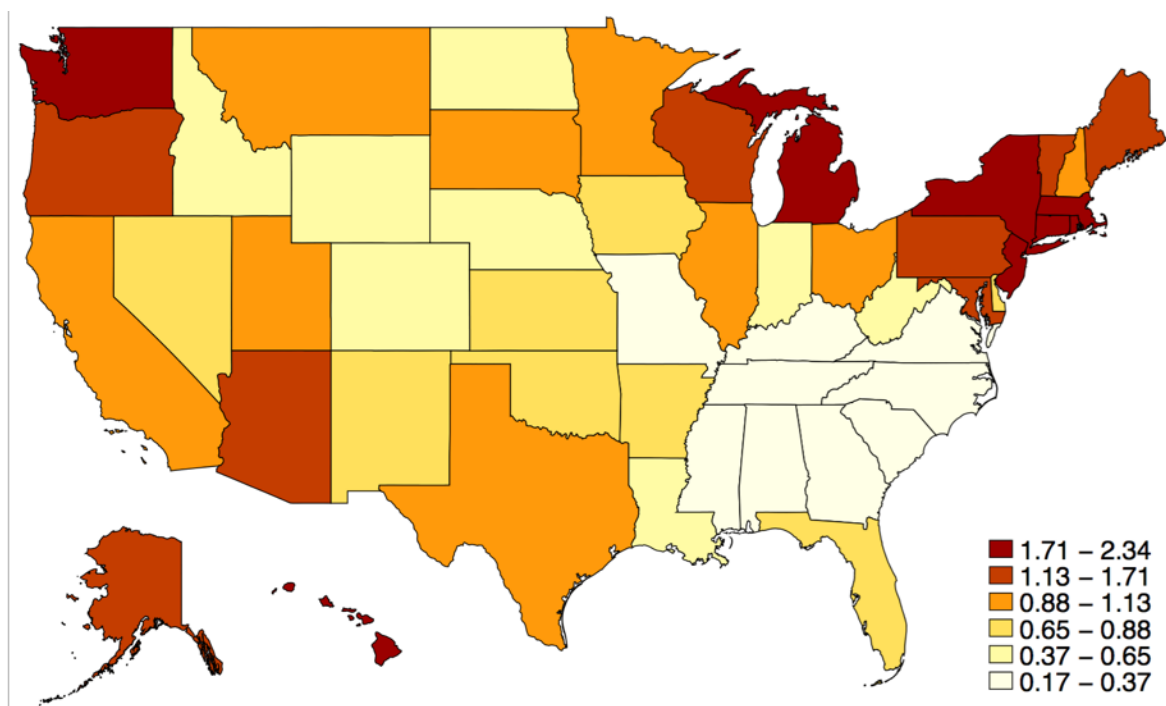

Panel B. Average annual change in cigarette tax (\$ per pack) by state during the study period

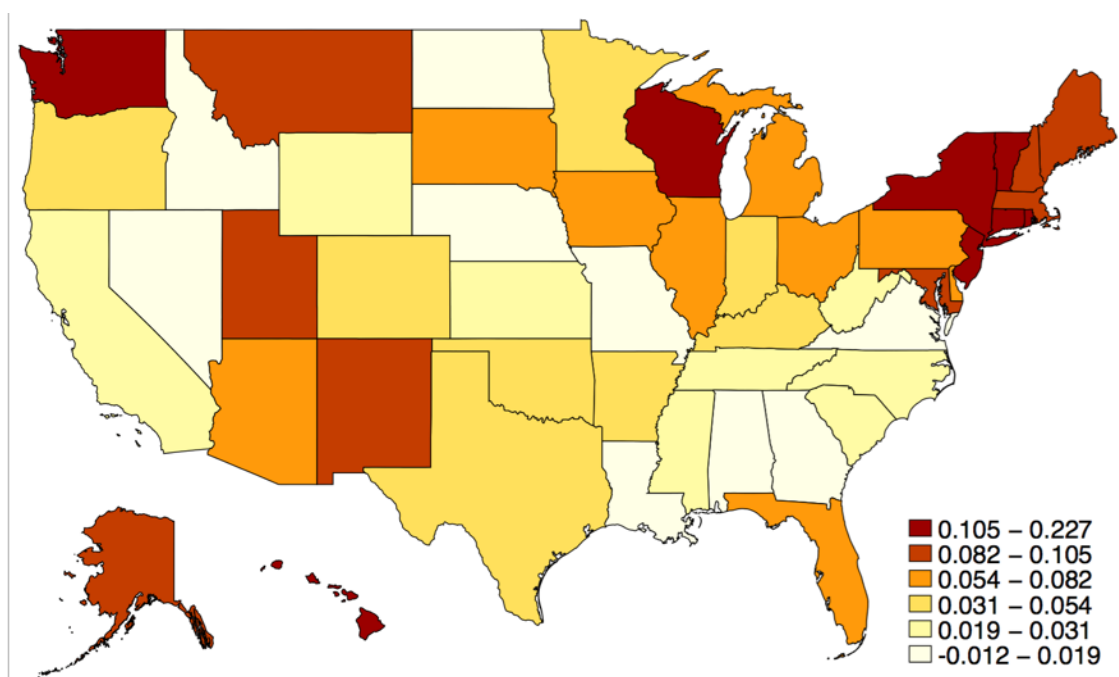

**Figure S2.** National trends in life expectancy, non-smoking prevalence, and cigarette tax rates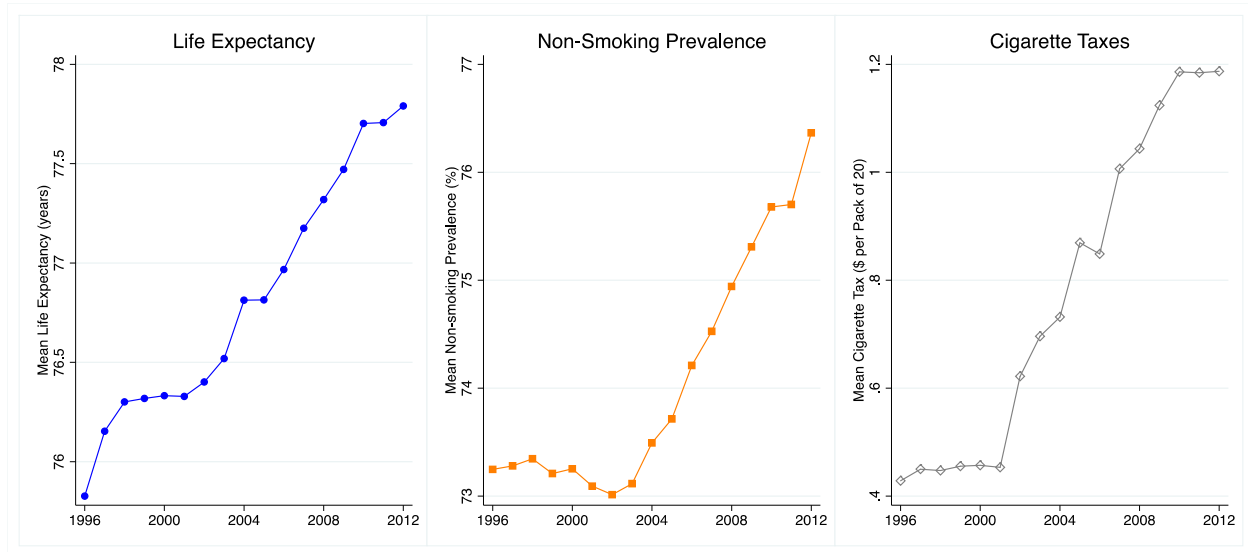

**Figure S3.** Residuals from a regression of life expectancy on cigarette taxes and smoking prevalence on cigarette taxes

Panel A. Life Expectancy: Distribution of residuals relative to a normal distribution

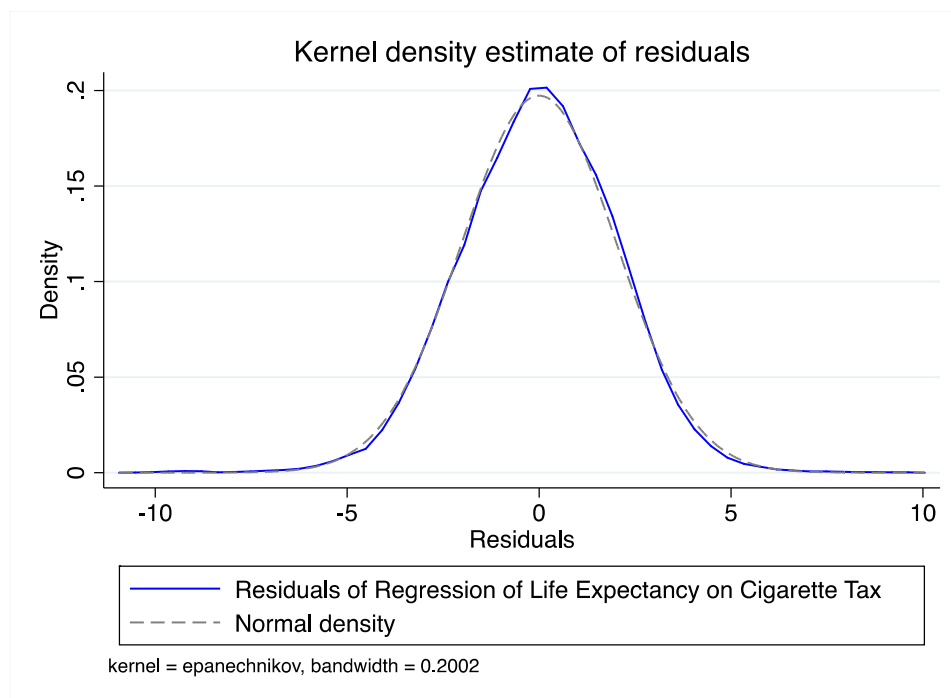

Panel B. Smoking Prevalence: Distribution of residuals relative to a normal distribution

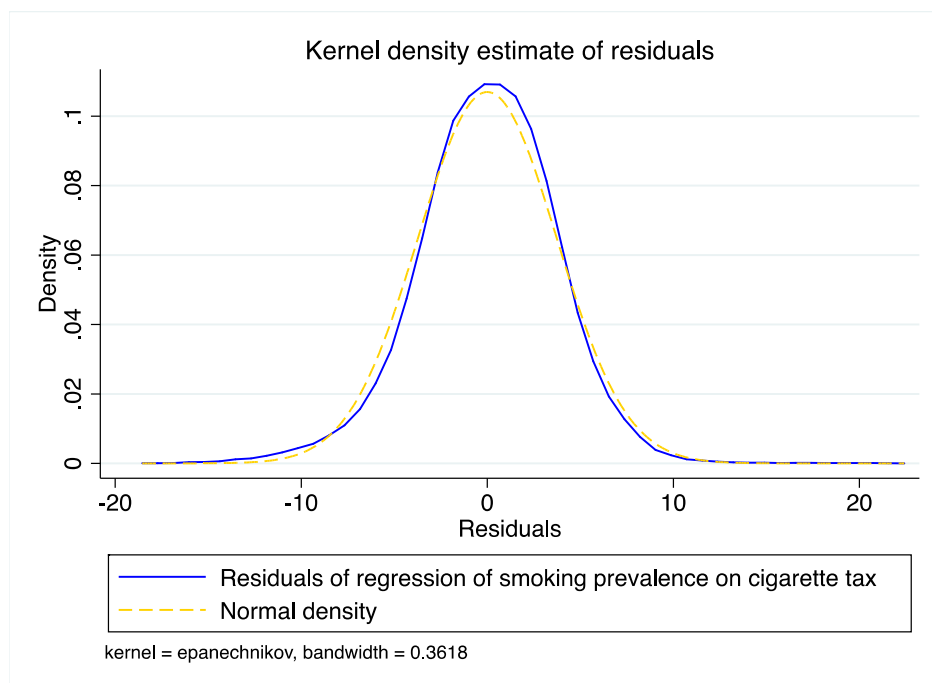

**Figure S4.** Residuals from the log error-correction models

Panel A. Distribution of residuals relative to a normal distribution

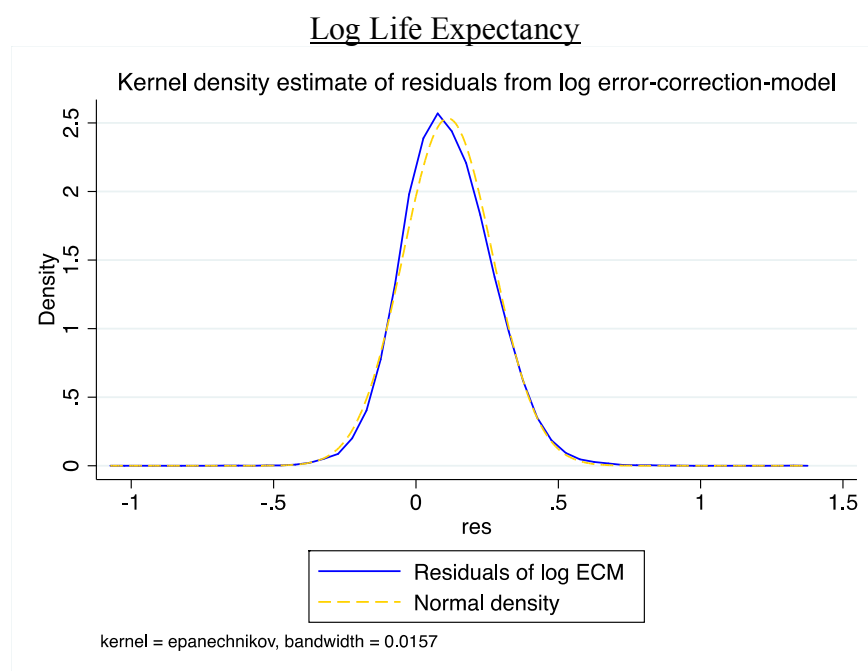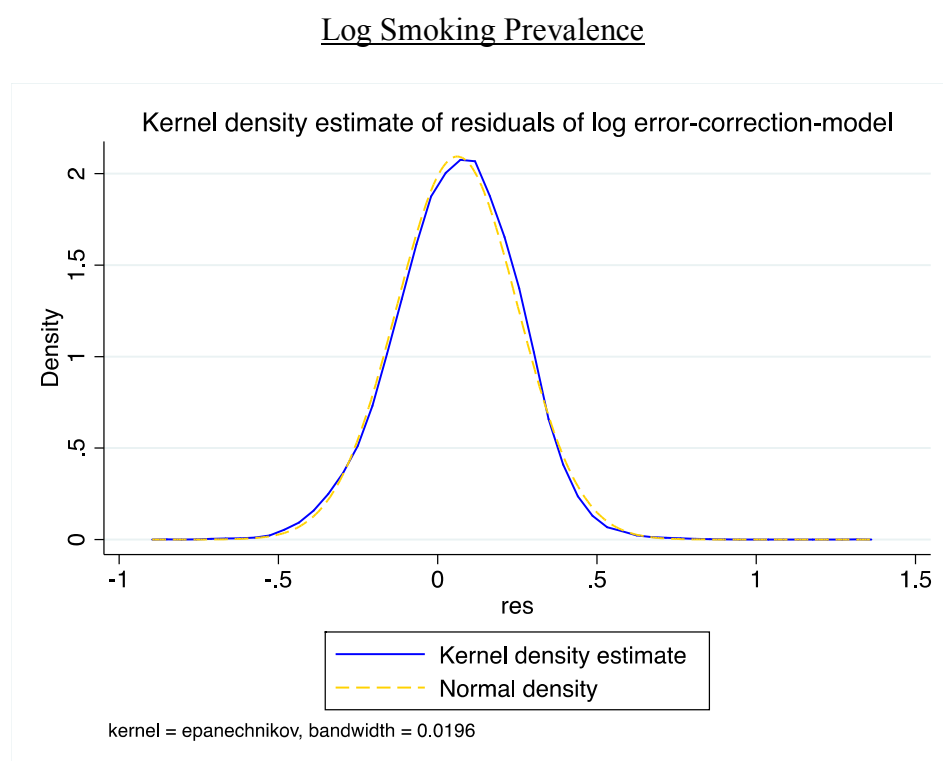

Panel B. Residuals over time

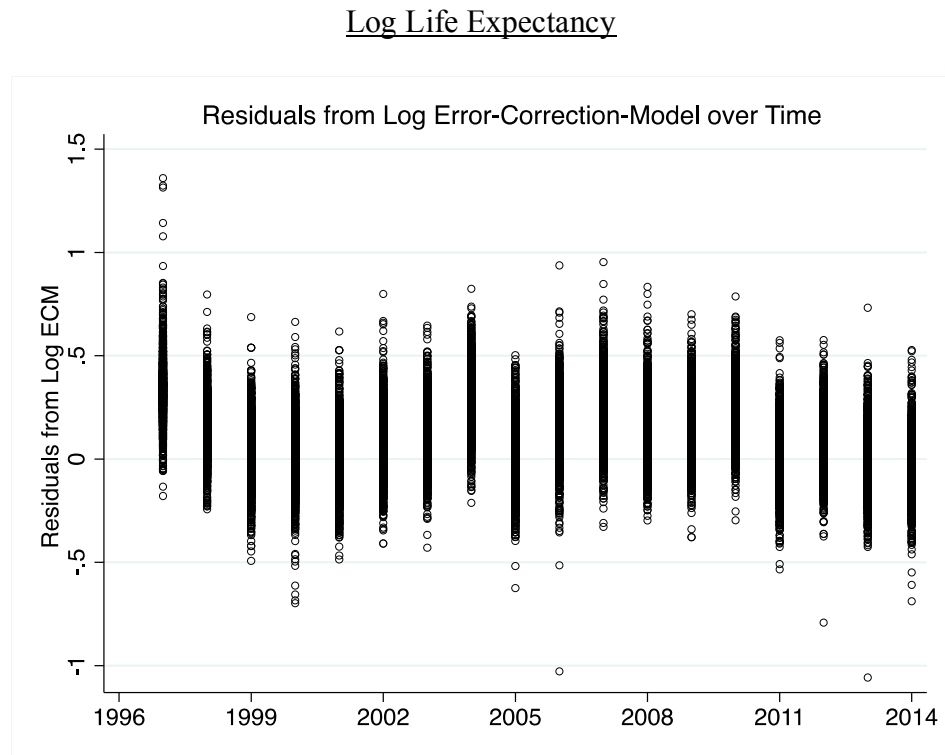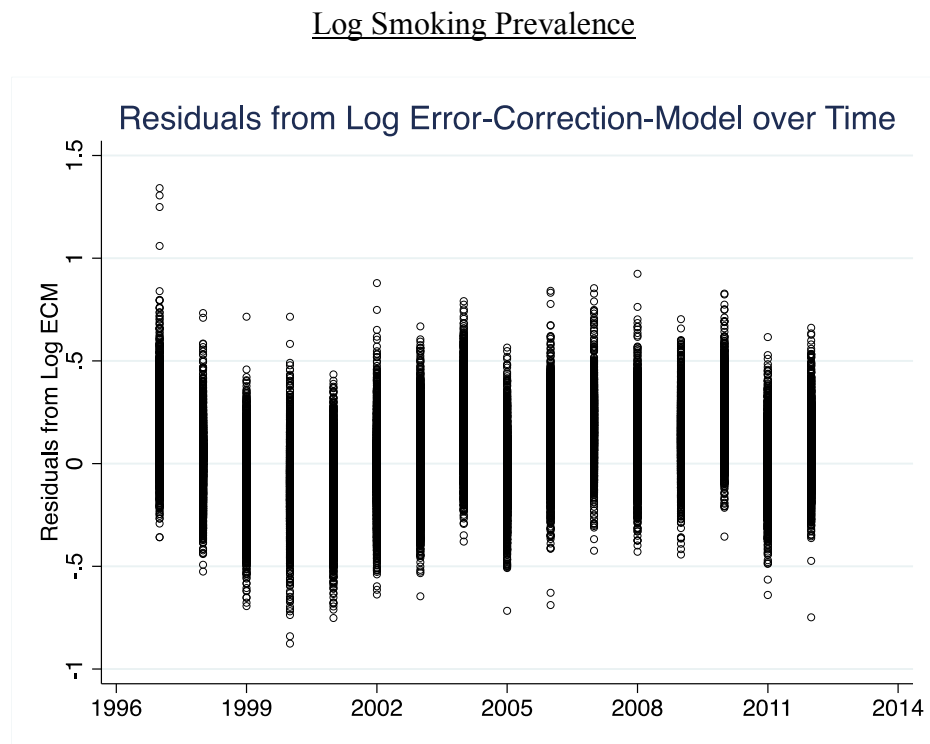

**Figure S5.** Long-run Association of Cigarette Tax and Mortality Rates by Cause of Death**Panel A.** Cardiovascular Disease Related Mortality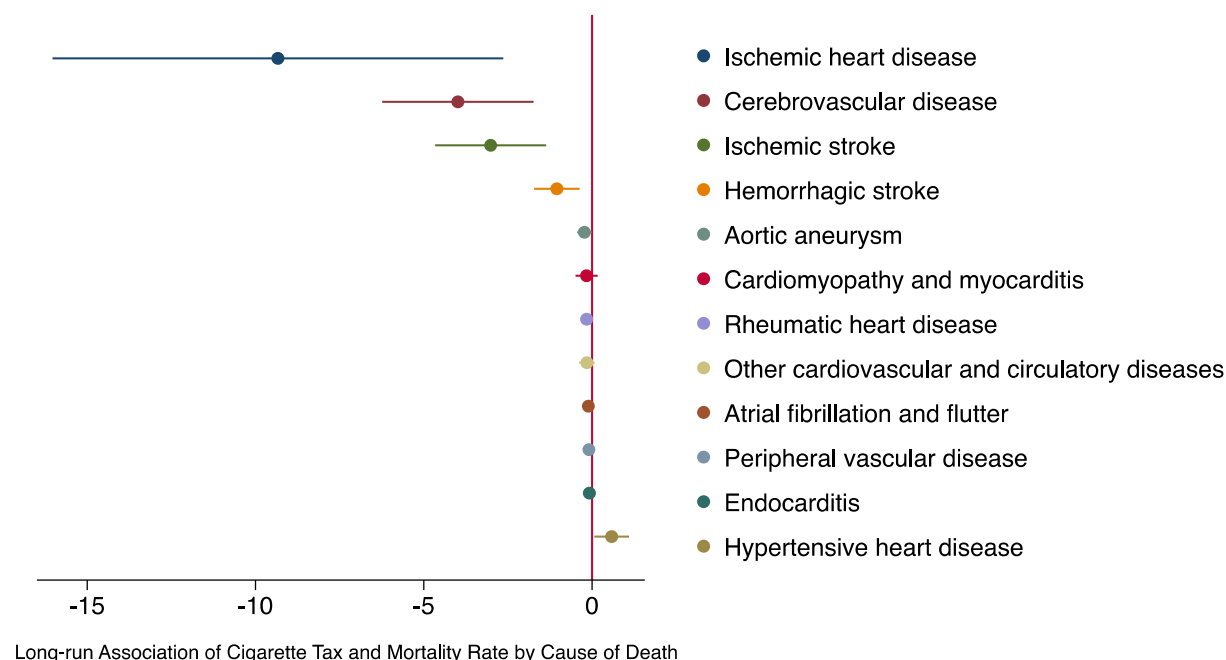**Panel B.** Cancer Related Mortality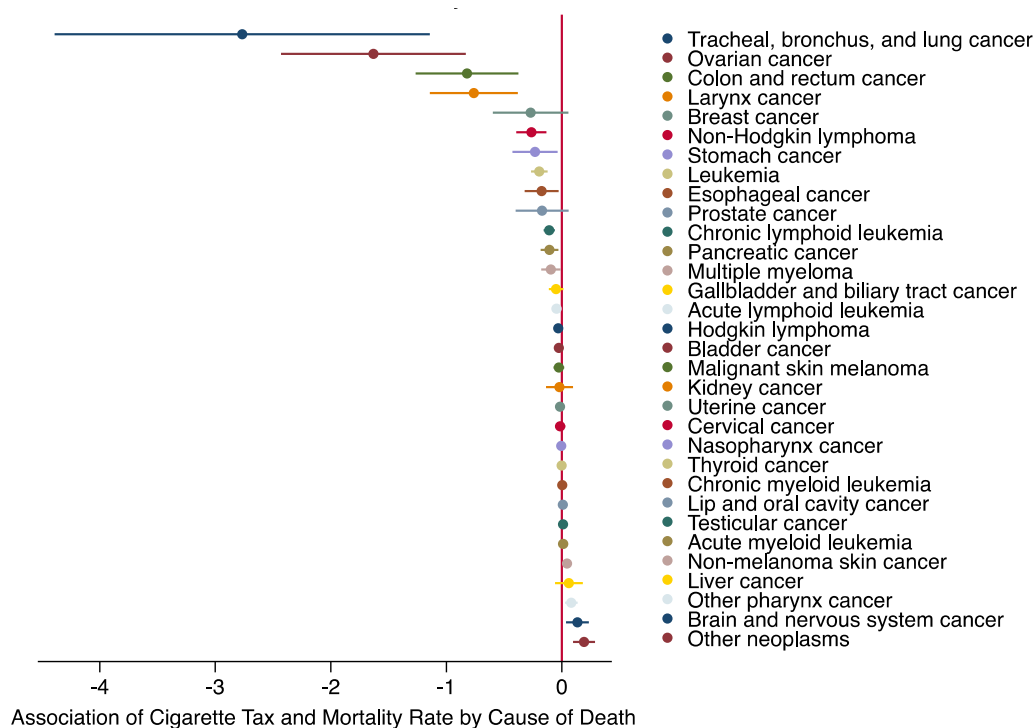

**Panel C. Respiratory Disease Related Mortality**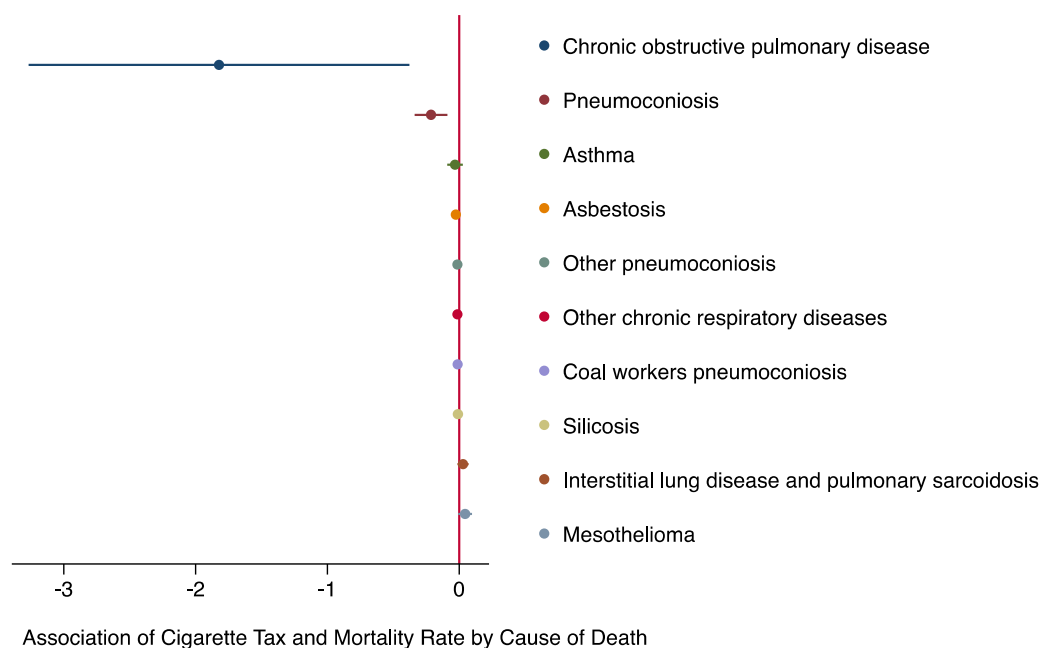**Panel D. Injury Related Mortality**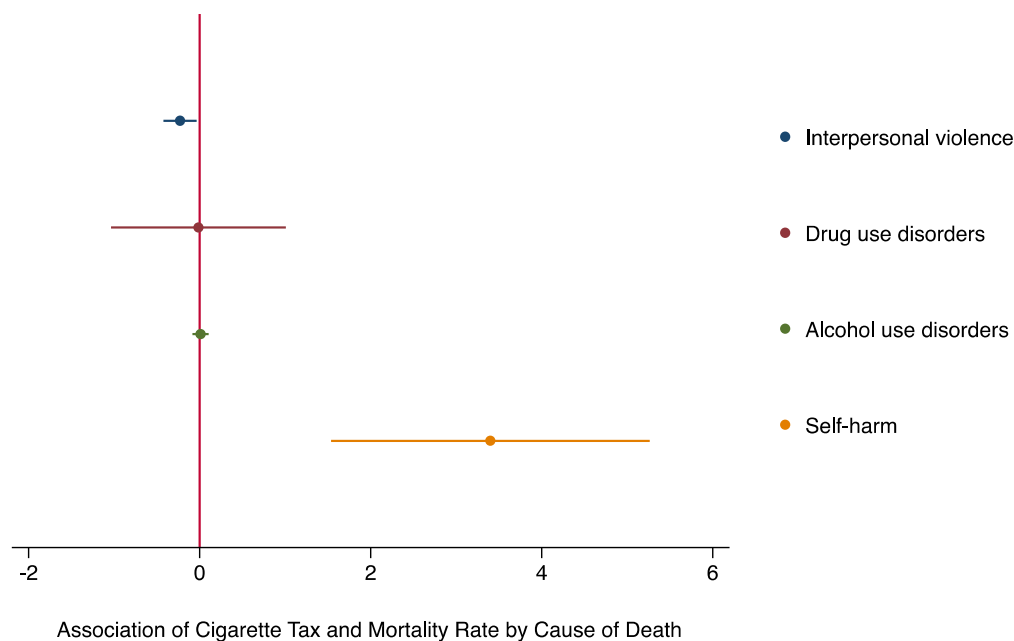

*Notes:* Long-run changes in annual mortality rate by cause of death at the county-level from the main regression analysis with adjustment for county-year income per capita, share female, share Black, share over 65, share under 18, and share with high school, and fixed effects for county. 95% confidence intervals reflect Huber-White robust standard errors clustered at the state level.

Negative values represent reductions in cause-specific age-standardized mortality rates (deaths per 100,000 population). Cigarette tax dollars are inflation-adjusted to 2016 year dollars. See **Table S8** for results after a multiple test adjustment using the adaptive Holm step-down procedure for each major condition type.

Figure S6. Sensitivity analysis: main error-correction-model with annual state smoking-related policies included as time-varying covariates

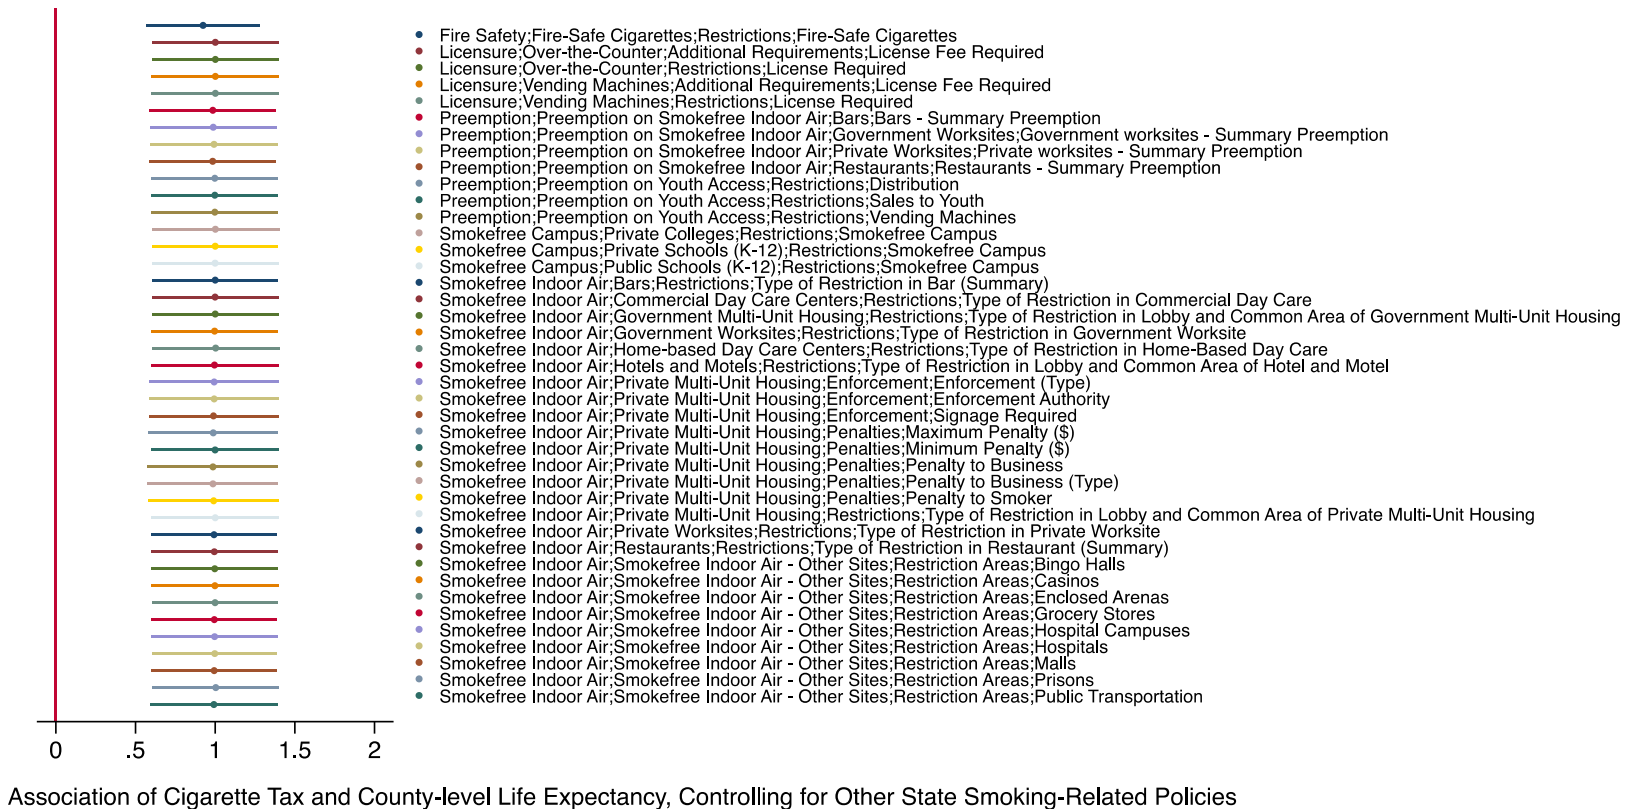

*Notes:* Long-run changes in life expectancy at the county-level from the main regression analysis with adjustment for various state-year smoking policies and for county-year income per capita, share female, share Black, share over 65, share under 18, and share with high school, and fixed effects for county. 95% confidence intervals reflect Huber-White robust standard errors clustered at the state level. Positive values represent increases in life expectancy. Cigarette tax dollars are inflation-adjusted to 2016 year dollars. Data on state policies was obtained from the Centers for Disease Control and Prevention's State Tobacco Activities Tracking and Evaluation (STATE) System. (<https://chronicdata.cdc.gov/Legislation/CDC-STATE-System-Tobacco-Legislation-Licensure/eb4y-d4ic>).

Note, the following state tobacco legislation categories were not analyzed because they lacked sufficient within-state variation over time to include those policies in a panel fixed effects model as a time-varying explanatory variable:

- Preemption; Preemption on Advertising; Restrictions; Display
- Preemption; Preemption on Advertising; Restrictions; Other
- Preemption; Preemption on Advertising; Restrictions; Promotion
- Preemption; Preemption on Advertising; Restrictions; Sampling
- Preemption; Preemption on Licensure ; Restrictions; Over-the-Counter
- Preemption; Preemption on Licensure ; Restrictions; Vending Machines
- Smokefree Indoor Air; Government Multi-Unit Housing; Restrictions; Type of Restriction in Living Area of Government Multi-Unit Housing
- Smokefree Indoor Air; Personal Vehicles; Restrictions; Type of Restriction in Personal Vehicle
- Smokefree Indoor Air; Private Multi-Unit Housing; Restrictions; Type of Restriction in Living Area of Private Multi-Unit Housing
